# Supplementary material
Source: Frontiers journal article supplement (https://www.frontiersin.org/articles/314625)
Supplement: Table_1.DOCX [file Table_1.DOCX]

| **TABLE 1 | Summary of meta-analysis of association between the TERT variant rs2736098 polymorphisms and cancer risk** | | | | | | | | | | | | | | | | |
| --- | --- | --- | --- | --- | --- | --- | --- | --- | --- | --- | --- | --- | --- | --- | --- | --- |
| Variables | N | A versus G | | | AA versus GG | | | GA versus GG | | | GA/AA versus GG | | | AA versus GA/GG | | |
|  | | OR(95%Cl) | Ph | I2(%) | OR(95%Cl) | Ph | I2(%) | OR(95%Cl) | Ph | I2(%) | OR(95%Cl) | Ph | I2(%) | OR(95%Cl) | Ph | I2(%) |
| All | 31 | 1.134(1.051-1.224) | 0 | 79.3 | 1.280(1.087-1.508) | 0 | 76.9 | 1.125(1.020-1.240) | 0 | 73.6 | 1.159(1.047-1.283) | 0 | 78.3 | 1.223(1.082-1.384) | 0 | 64.6 |
| Cancer type |  |  |  |  |  |  |  |  |  |  |  |  |  |  |  |  |
| Lung Cancer | 10 | 1.299(1.216-1.386) | 0.285 | 17.1 | 1.796(1.575-2.047) | 0.907 | 0 | 1.199(1.086-1.323) | 0.211 | 25.2 | 1.305(1.188-1.434) | 0.197 | 26.8 | 1.653(1.461-1.869) | 0.97 | 0 |
| Bladder Cancer | 6 | 1.152(1.032-1.286) | 0.079 | 49.3 | 1.345(1.058-1.708) | 0.096 | 46.5 | 1.097(0.940-1.279) | 0.092 | 47.2 | 1.149(0.990-1.334) | 0.077 | 49.8 | 1.297(1.062-1.586) | 0.178 | 34.4 |
| Breast Cancer | 3 | 0.816(0.670-0.994) | 0.107 | 55.2 | 0.639(0.458-0.892) | 0.235 | 30.9 | 0.872(0.675-1.127) | 0.194 | 39 | 0.796(0.592-1.070) | 0.117 | 53.3 | 0.707(0.566-0.884) | 0.361 | 1.9 |
| Hepatocellular Carcinoma | 3 | 1.211(0.948-1.548) | 0.057 | 65.1 | 1.179(0.711-1.956) | 0.081 | 60.2 | 1.595(1.246-2.042) | 0.254 | 27.1 | 1.494(1.123-1.987) | 0.133 | 50.4 | 0.921(0.617-1.376) | 0.161 | 45.3 |
| Colorectal Cancer | 2 | 0.717(0.562-0.915) | 0.371 | 0 | 0.477(0.276-0.825) | 0.611 | 0 | 0.539(0.207-1.401) | 0.047 | 74.6 | 0.592(0.312-1.121) | 0.097 | 63.8 | 0.726(0.462-1.141) | 0.63 | 0 |
| Renal Cell Carcinoma | 1 | 2.081(1.642-2.637) | - | - | 4.934(2.922-8.332) | - | - | 4.107(2.495-6.761) | - | - | 4.424(2.752-7.112) | - | - | 1.811(1.275-2.571) | - | - |
| Oral squamous cell carcinoma | 1 | 0.518(0.341-0.786) | - | - | 0.230(0.076-0.697) | - | - | 0.243(0.120-0.492) | - | - | 0.241(0.121-0.482) | - | - | 0.618(0.232-1.647) | - | - |
| Esophageal Cancer | 1 | 1.047(0.889-1.234) | - | - | 1.146(0.799-1.645) | - | - | 0.998(0.787-1.265) | - | - | 1.027(0.820-1.286) | - | - | 1.148(0.818-1.610) | - | - |
| Cervic Cancer | 1 | 1.118(0.984-1.269) | - | - | 1.335(1.025-1.739) | - | - | 0.979(0.809-1.186) | - | - | 1.059(0.884-1.267) | - | - | 1.350(1.059-1.721) | - | - |
| Glioma | 1 | 1.194(1.050-1.359) | - | - | 1.476(1.113-1.959) | - | - | 1.162(0.961-1.405) | - | - | 1.223(1.021-1.465) | - | - | 1.359(1.045-1.768) | - | - |
| Laryngeal Cancer | 1 | 1.066(0.842-1.351) | - | - | 0.750(0/378-1.490) |  | - | 1.239(0.923-1.664) | - | - | 1.170(0.881-1.554) | - | - | 0.694(0.353-1.367) | - | - |
| SCCHN | 1 | 0.923(0.807-1.055) | - | - | 0.904(0.643-1.271) | - | - | 0.890(0.747-1.061) | - | - | 0.892(0.755-1.055) | - | - | 0.951(0.682-1.325) | - | - |
| Ethnicity |  |  |  |  |  |  |  |  |  |  |  |  |  |  |  |  |
| Asian | 20 | 1.217(1.138-1.301) | 0 | 59.7 | 1.509(1.327-1.716) | 0.009 | 48.3 | 1.170(1.066-1.284) | 0.001 | 56 | 1.240(1.132-1.358) | 0 | 59 | 1.396(1.245-1.565) | 0.02 | 43.6 |
| Caucasian | 11 | 0.965(0.818-1.140) | 0 | 85.9 | 0.875(0.588-1.302） | 0 | 85 | 0.984(0.785-1.235) | 0 | 84.7 | 0.964(0.765-1.214) | 0 | 87 | 0.928(0.730-1.181) | 0.001 | 65.5 |
| CI=confidence interval, OR=odds ratio, I2=the variation in OR attributable to heterogeneity SCCHN= squamous cell carcinoma of the head and neck | | | | | | | | | | | | | | | | |
